# Supplementary material for: Combining CEUS and CT/MRI LI-RADS major imaging features: diagnostic accuracy for classification of indeterminate liver observations in patients at risk for HCC
Source: Springer Nature journal article supplement (doi:10.1007/s00261-024-04625-w), 2024-10-23
Supplement: MOESM1 [file 261_2024_4625_MOESM1_ESM.pdf]

# Combining CEUS and CT/MRI LI-RADS Major Imaging Features: Diagnostic Accuracy for Classification of Indeterminate Liver Observations in Patients at Risk for HCC

Journal Name: Abdominal Radiology Journal

Tania Siu Xiao, MD<sup>1</sup>; Cristina Mariuxi Kuon Yeng Escalante, MD<sup>1</sup>; Aylin Tahmasebi, MD<sup>1</sup>; Yuko Kono, MD, PhD, FAIUM, FAASLD<sup>2</sup>; Fabio Piscaglia, MD, PhD<sup>3,4</sup>; Stephanie R. Wilson, MD, FRCPC<sup>5</sup>; Alexandra Medellin-Kowalewski, MD, FRCPC<sup>5</sup>; Shuchi K. Rodgers, MD<sup>1,6</sup>; Virginia Planz, MD<sup>7</sup>; Aya Kamaya, MD<sup>8</sup>; David T. Fetzer, MD<sup>9</sup>; Annalisa Berzigotti, MD, PhD<sup>10</sup>; Iuliana-Pompilia Radu, MD<sup>10</sup>; Paul S. Sidhu, BSc, MBBS, MRCP, FRCR, DTM&H, FCIRSE, FAIUM<sup>11</sup>; Corinne E. Wessner, MS, MBA, RDMS, RVT<sup>1</sup>; Kristen Bradigan, RN, BSN<sup>1</sup>; John R. Eisenbrey, PhD<sup>1</sup>; Flemming Forsberg, PhD, FAIUM, FAIMBE<sup>1</sup>; Andrej Lyshchik, MD, PhD<sup>1</sup>; CEUS LI-RADS Trial Group.

<sup>1</sup> Thomas Jefferson University Hospital, Philadelphia PA, United States

<sup>2</sup> University of California, San Diego, San Diego CA, United States

<sup>3</sup> Division of Internal Medicine, Hepatobiliary and Immunoallergic Diseases, IRCCS Azienda Ospedaliero-Universitaria di Bologna, Italy

<sup>4</sup> Department of Medical and Surgical Sciences, University of Bologna, Italy

<sup>5</sup> University of Calgary, Calgary, Canada

<sup>6</sup> Einstein Medical Center, Philadelphia PA, United States

<sup>7</sup> Vanderbilt University, Nashville TN, United States

<sup>8</sup> Stanford University, Stanford CA, United States

<sup>9</sup> UT Southwestern Medical Center, Dallas, TX, United States

<sup>10</sup> Department of Visceral Surgery and Medicine, Bern University Hospital, University of Bern, Bern, Switzerland

<sup>11</sup> Department of Imaging Sciences, School of Biomedical Engineering and Imaging Sciences, Faculty of Life Sciences and Medicine, King's College London. Department of Radiology, King's College Hospital, London, UK

## Corresponding Author:

Andrej Lyshchik

Associate Professor of Radiology

[andrej.lyshchik@jefferson.edu](mailto:andrej.lyshchik@jefferson.edu)

## **SUPPLEMENTAL TABLES AND FIGURES**

**Online Resource 1** Combination groups of multimodality imaging with LI-RADS imaging major features

| <b>Groups</b> | <b>Multimodality Combinations of LI-RADS Major Features</b> |
|---------------|-------------------------------------------------------------|
| #1            | CEUS APHE + CT/MRI APHE                                     |
| #2            | CEUS APHE + CT/MRI WO                                       |
| #3            | CEUS WO + CT/MRI APHE                                       |
| #4            | CEUS WO + CT/MRI WO                                         |
| #5            | CT/MRI APHE + CEUS late and mild WO                         |
| #6            | CT/MRI WO + CEUS late and mild WO                           |
| #7            | CEUS APHE + CT/MRI (capsule enhancement)                    |
| #8            | CEUS APHE + CT/MRI (threshold growth)                       |
| #9            | CEUS late and mild WO + CT/MRI (capsule enhancement)        |
| #10           | CEUS late and mild WO + CT/MRI (threshold growth)           |

APHE = arterial-phase hyper-enhancement, CEUS = contrast-enhanced ultrasound, CT = computed tomography, LI-RADS = Liver Imaging Reporting and Data System, MRI = magnetic resonance imaging, WO = washout (regardless of timing or degree)

**Online Resource 2** Variables used for the stepwise logistical regression analysis

| <b>VARIABLES</b>                  | <b>DESCRIPTION</b>                                                                                            |
|-----------------------------------|---------------------------------------------------------------------------------------------------------------|
| <b>Dependent</b>                  |                                                                                                               |
| <i>Pathology (Subgroup 1)</i>     | Benign or all malignancy (HCC and non-HCC malignancy)                                                         |
| <i>Pathology (Subgroup 2)</i>     | HCC or everything else (benign and non-HCC malignancy)                                                        |
| <b>Independent</b>                |                                                                                                               |
| <i>CEUS APHE</i>                  | Hypo-enhancement, iso-enhancement, rim-enhancement, or hyperenhancement                                       |
| <i>CEUS WO (Presence)</i>         | Absent or present                                                                                             |
| <i>CEUS WO (Degree)</i>           | Mild or marked                                                                                                |
| <i>CEUS WO (Time)</i>             | Early or late                                                                                                 |
| <i>CEUS WO (Time + Degree)</i>    | Early, late + marked, or late + mild                                                                          |
| <i>CT/MRI APHE</i>                | Hypo-enhancement, iso-enhancement, rim-enhancement, hyperenhancement, or peripheral discontinuous enhancement |
| <i>CT/MRI WO</i>                  | Absent or present                                                                                             |
| <i>CT/MRI capsule enhancement</i> | Absent or present                                                                                             |
| <i>CT/MRI threshold growth</i>    | Absent or present                                                                                             |
| <i>CEUS LI-RADS categories</i>    | LR-3, LR-4, LR-M, or LR-TIV                                                                                   |
| <i>CT/MRI LI-RADS categories</i>  | LR-3, LR-4, or LR-M                                                                                           |
| <i>Age</i>                        | Original value                                                                                                |
| <i>BMI</i>                        | Original value                                                                                                |

APHE = arterial-phase hyper-enhancement, BMI = body mass index, CEUS = contrast-enhanced ultrasound, CT = computed tomography, HCC = hepatocellular carcinoma, LI-RADS = Liver Imaging Reporting and Data System, MRI = magnetic resonance imaging, WO = washout

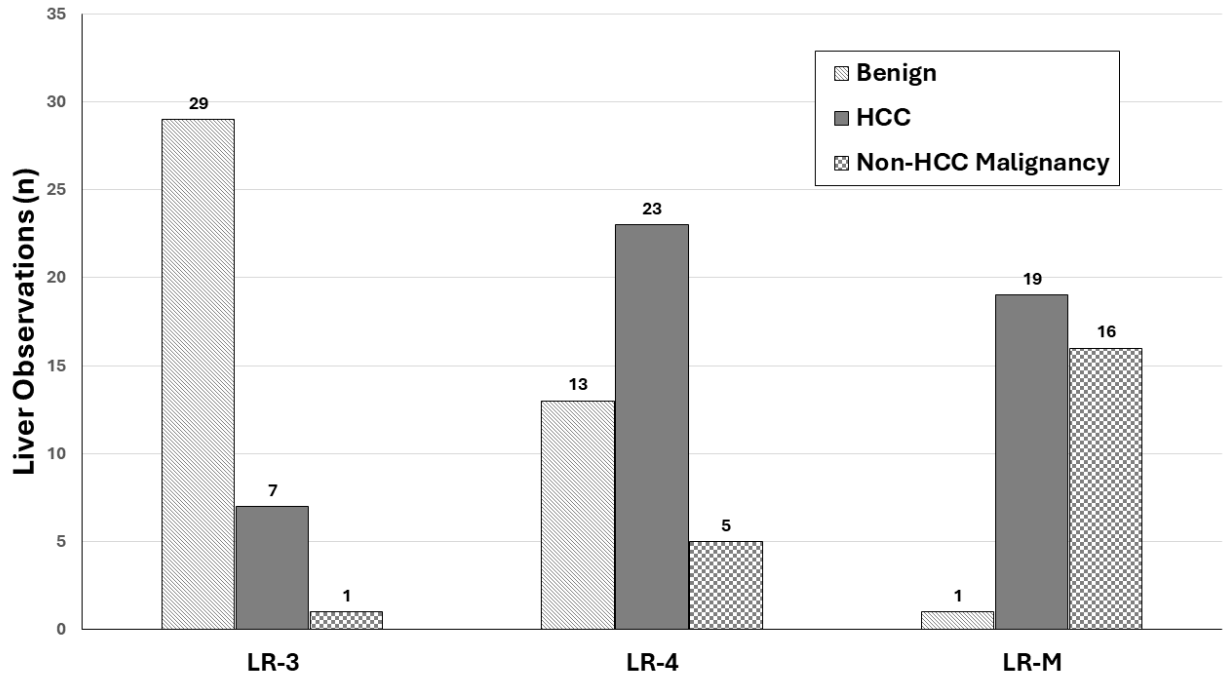

**Online Resource 3** Final diagnosis of initial CT/MRI indeterminate liver observations

HCC = hepatocellular carcinoma

**Online Resource 4** Initial CEUS and CT/MRI LI-RADS classification of liver observations with the final diagnosis

| <b>Final Diagnosis</b>   |        | <b>Initial CEUS<br/>LI-RADS</b> | <b>Initial CT/MRI<br/>LI-RADS</b> | <b>Total<br/>cases (n)</b> |
|--------------------------|--------|---------------------------------|-----------------------------------|----------------------------|
| <b>Benign</b>            |        |                                 |                                   |                            |
| <i>Follow-up CT/MRI</i>  | LR-3   | 28                              | 27                                | 35                         |
|                          | LR-4   | 6                               | 8                                 |                            |
|                          | LR-M   | 1                               | 0                                 |                            |
| <i>Biopsy</i>            | LR-3   | 0                               | 0                                 | 5                          |
|                          | LR-4   | 5                               | 4                                 |                            |
|                          | LR-M   | 0                               | 1                                 |                            |
| <i>Explant Histology</i> | LR-3   | 3                               | 2                                 | 3                          |
|                          | LR-4   | 0                               | 1                                 |                            |
|                          | LR-M   | 0                               | 0                                 |                            |
| <b>HCC</b>               |        |                                 |                                   |                            |
| <i>Follow-up CT/MRI</i>  | LR-3   | 6                               | 3                                 | 17                         |
|                          | LR-4   | 10                              | 11                                |                            |
|                          | LR-M   | 1                               | 3                                 |                            |
| <i>Biopsy</i>            | LR-3   | 5                               | 3                                 | 23                         |
|                          | LR-4   | 11                              | 6                                 |                            |
|                          | LR-M   | 6                               | 14                                |                            |
|                          | LR-TIV | 1                               | 0                                 |                            |
| <i>Explant Histology</i> | LR-3   | 5                               | 1                                 | 9                          |
|                          | LR-4   | 2                               | 6                                 |                            |
|                          | LR-M   | 2                               | 2                                 |                            |
| <b>Other malignancy</b>  |        |                                 |                                   |                            |
| <i>Follow-up CT/MRI</i>  | LR-3   | 0                               | 0                                 | 1                          |
|                          | LR-4   | 0                               | 0                                 |                            |
|                          | LR-M   | 1                               | 1                                 |                            |
| <i>Biopsy</i>            | LR-3   | 0                               | 0                                 | 20                         |
|                          | LR-4   | 2                               | 5                                 |                            |
|                          | LR-M   | 18                              | 15                                |                            |
| <i>Explant Histology</i> | LR-3   | 1                               | 1                                 | 1                          |
|                          | LR-4   | 0                               | 0                                 |                            |
|                          | LR-M   | 0                               | 0                                 |                            |

CEUS = contrast-enhanced ultrasound, CT = computed tomography, HCC = hepatocellular carcinoma, LI-RADS = Liver Imaging Reporting and Data System, MRI = magnetic resonance imaging

**Online Resource 5** Distribution of CEUS and CT/MRI LI-RADS major features for all indeterminate liver nodules

| <b>CEUS* LI-RADS<br/>Major Features</b> |          | <b>CT/MRI LI-RADS<br/>Major Features</b> |          |
|-----------------------------------------|----------|------------------------------------------|----------|
| <b>CEUS LR-3</b>                        | <b>n</b> | <b>CT/MRI LR-3</b>                       | <b>n</b> |
| Total Nodules                           | 48       | Total Nodules                            | 37       |
| <b>APHE</b>                             |          | <b>APHE</b>                              |          |
| • Hyperenhancement                      | 1        | • Hyperenhancement                       | 16       |
| • Isoenhancement                        | 32       | • Isoenhancement                         | 13       |
| • Hypoenhancement                       | 15       | • Hypoenhancement                        | 7        |
| • Rim-enhancement                       | 0        | • Rim-enhancement                        | 0        |
|                                         |          | • No Enhancement                         | 1        |
| <b>WO</b>                               |          | <b>WO</b>                                |          |
| • Present                               | 3        | • Present                                | 8        |
| • Absent                                | 45       | • Absent                                 | 29       |
| <b>WO Timing</b>                        |          | <b>Capsule Enhancement</b>               |          |
| • Early                                 | 0        | • Present                                | 0        |
| • Late                                  | 3        | • Absent                                 | 37       |
| <b>WO Degree</b>                        |          | <b>Threshold Growth</b>                  |          |
| • Mild                                  | 3        | • Present                                | 0        |
| • Marked                                | 0        | • Absent                                 | 37       |
| <b>CEUS LR-4</b>                        | <b>n</b> | <b>CT/MRI LR-4</b>                       | <b>n</b> |
| Total Nodules                           | 36       | Total Nodules                            | 41       |
| <b>APHE</b>                             |          | <b>APHE</b>                              |          |
| • Hyperenhancement                      | 26       | • Hyperenhancement                       | 27       |
| • Isoenhancement                        | 5        | • Isoenhancement                         | 11       |
| • Hypoenhancement                       | 5        | • Hypoenhancement                        | 2        |
| • Rim-enhancement                       | 0        | • Rim-enhancement                        | 0        |
|                                         |          | • Peripheral Discontinuous Enhancement   | 1        |
| <b>WO</b>                               |          | <b>WO</b>                                |          |
| • Present                               | 9        | • Present                                | 13       |
| • Absent                                | 27       | • Absent                                 | 28       |
| <b>Wo Timing</b>                        |          | <b>Capsule Enhancement</b>               |          |
| • Early                                 | 0        | • Present                                | 6        |
| • Late                                  | 9        | • Absent                                 | 35       |
| <b>Wo Degree</b>                        |          | <b>Threshold Growth</b>                  |          |
| • Mild                                  | 9        | • Present                                | 5        |

|                    |          |                            |          |
|--------------------|----------|----------------------------|----------|
| • Marked           | 0        | • Absent                   | 36       |
| <b>CEUS LR-M</b>   | <b>n</b> | <b>CT/MRI LR-M</b>         | <b>n</b> |
| Total Nodules      | 29       | Total Nodules              | 36       |
| <b>APHE</b>        |          | <b>APHE</b>                |          |
| • Hyperenhancement | 12       | • Hyperenhancement         | 9        |
| • Isoenhancement   | 2        | • Isoenhancement           | 3        |
| • Hypoenhancement  | 2        | • Hypoenhancement          | 0        |
| • Rim-Enhancement  | 13       | • Rim-enhancement          | 24       |
| <b>WO</b>          |          | <b>WO</b>                  |          |
| • Present          | 28       | • Present                  | 10       |
| • Absent           | 1        | • Absent                   | 26       |
| <b>WO Timing</b>   |          | <b>Capsule Enhancement</b> |          |
| • Early            | 13       | • Present                  | 3        |
| • Late             | 15       | • Absent                   | 33       |
| <b>WO Degree</b>   |          | <b>Threshold Growth</b>    |          |
| • Mild             | 12       | • Present                  | 10       |
| • Marked           | 16       | • Absent                   | 26       |

Note. \*CEUS LI-RADS classified one nodule as LR-TIV (isoenhancement, WO present, late WO, and mild WO). For this case, CT/MRI LI-RADS classified it as LR-3 (Hypoenhancement, WO absent, no capsule enhancement, and no threshold growth).

APHE = arterial-phase hyper-enhancement, CEUS = contrast-enhanced ultrasound, CT = computed tomography, LI-RADS = Liver Imaging Reporting and Data System, MRI = magnetic resonance imaging, WO = washout

**Online Resource 6** Results of stepwise logistical regression analysis

| <b>CATEGORIES</b>              | <b>P-value</b> | <b>ROC</b> |
|--------------------------------|----------------|------------|
| <b>All CT/MRI observations</b> |                |            |
| <i>Benign vs All Malignant</i> |                |            |
| o CEUS APHE                    | 0.005**        | 0.8914     |
| o CT/MRI LI-RADS               | <0.001***      | 0.8914     |
| <i>HCC vs Everything Else</i>  |                |            |
| o CEUS APHE                    | 0.0025**       | 0.7699     |
| o CEUS LI-RADS                 | 0.0031**       | 0.7699     |
| o CT/MRI LI-RADS               | 0.0025**       | 0.7699     |
| <b>CT/MRI LR-3</b>             |                |            |
| <i>Benign vs All Malignant</i> |                |            |
| o CEUS APHE                    | 0.0082**       | 0.7845     |
| <i>HCC vs Everything Else</i>  |                |            |
| o CEUS APHE                    | 0.0057**       | 0.8095     |
| <b>CT/MRI LR-4</b>             |                |            |
| <i>Benign vs All Malignant</i> |                |            |
| o CEUS APHE                    | 0.2875 (ns)    | 0.5989     |
| <i>HCC vs Everything Else</i>  |                |            |
| o Age                          | 0.0288*        | 0.6739     |
| <b>CT/MRI LR-M</b>             |                |            |
| <i>Benign vs All Malignant</i> |                |            |
| o CT/MRI APHE                  | 0.7598 (ns)    | 0.5857     |
| <i>HCC vs Everything Else</i>  |                |            |
| o CEUS LI-RADS                 | 0.0149*        | 0.7167     |
| <b>CT/MRI LR-3 + LR-4</b>      |                |            |
| <i>Benign vs All Malignant</i> |                |            |
| o CEUS APHE                    | 0.0144*        | 0.8016     |
| o CT/MRI LI-RADS               | 0.0004***      | 0.8016     |
| <i>HCC vs Everything Else</i>  |                |            |
| o Age                          | 0.0367*        | 0.7899     |
| o CEUS APHE                    | 0.0113*        | 0.7899     |
| o CT/MRI LI-RADS               | 0.0025**       | 0.7899     |

Note. —ns (nonsignificant)  $P > 0.05$ , \* $P \leq 0.05$ , \*\* $P \leq 0.01$ , \*\*\* $P \leq 0.001$

APHE = arterial-phase hyper-enhancement, BMI = body mass index, CEUS = contrast-enhanced ultrasound, CT = computed tomography, CI = confidence interval, HCC = hepatocellular carcinoma, LI-RADS = Liver Imaging Reporting and Data System, MRI = magnetic resonance imaging, ROC = Receiver operating characteristic

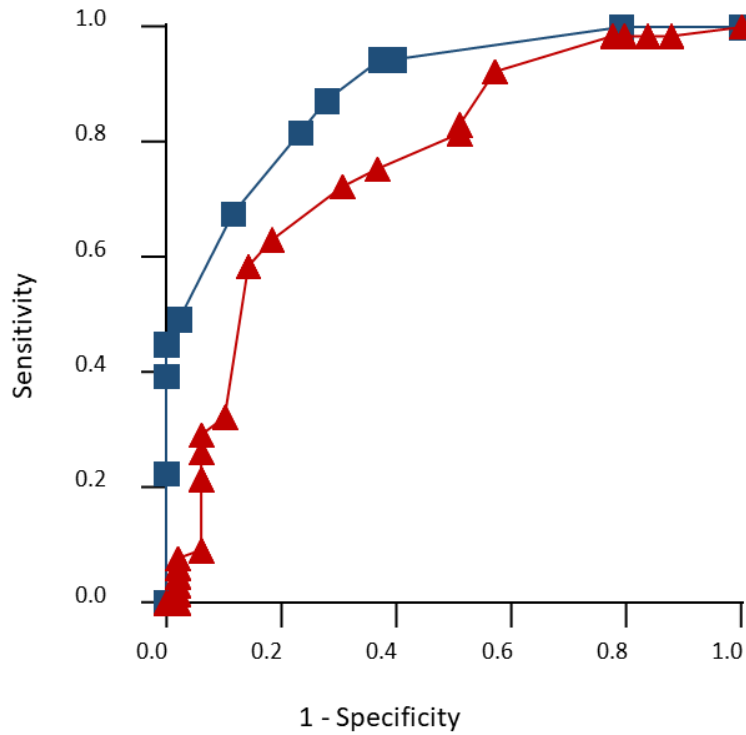

**Area under ROC curve All Observations**

- 0.8914 - Benign vs All Malignancy
- ▲ 0.7699 - HCC vs Everything Else (Benign + Non-HCC Malignancy)

**Online Resource 7** Area under ROC curve for all observations

HCC = Hepatocellular carcinoma, ROC = Receiver operating characteristic

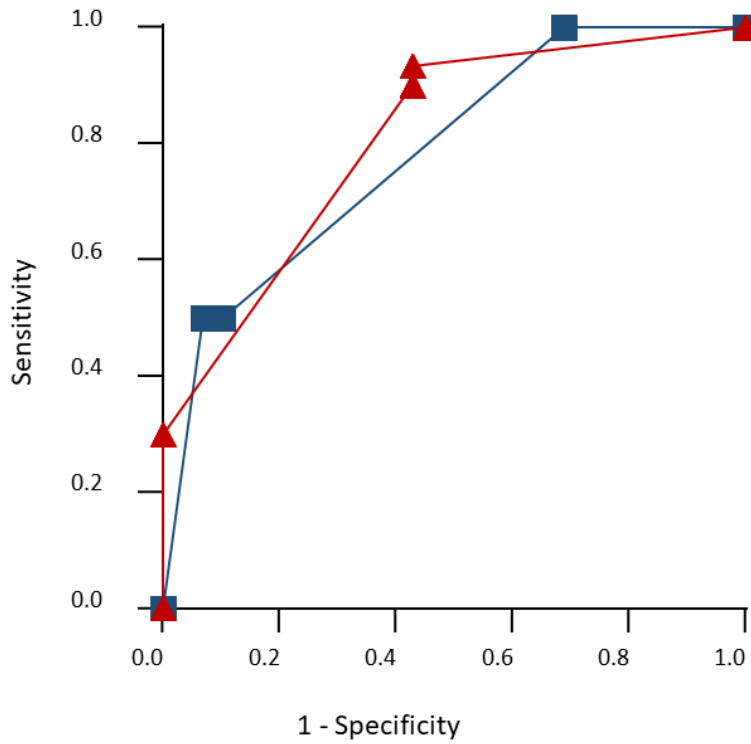

**Area under ROC curve LR-3**

- 0.7845 - Benign vs All Malignancy
- ▲ 0.8095 - HCC vs Everything Else (Benign + Non-HCC Malignancy)

**Online Resource 8** Area under ROC curve for LR-3 observations

HCC = Hepatocellular carcinoma, ROC = Receiver operating characteristic
